# Supplementary material
Source: MDPI journal article supplement (https://www.mdpi.com/2079-6412/14/3/273)
Supplement: s1 [file s1]

# Supplementary Materials: Hydrophobic and Transparent Tantalum Pentoxide-Based Coatings for Photovoltaic (PV) Solar Panels

Oana Cătălina Mocioiu <sup>1,\*</sup>, Irina Atkinson <sup>1</sup>, Ludmila Aricov <sup>1</sup>, Veronica Brătan <sup>1</sup>, Ana-Maria Mocioiu <sup>2</sup>, Ioan Albert Tudor <sup>2</sup> and Diana Irinel Băilă <sup>3</sup>

<sup>1</sup> Institute of Physical Chemistry Ilie Murgulescu of the Romanian Academy-ICF, Splaiul Independentei, No. 202, 060021 Bucharest, Romania; iatkinson@icf.ro (I.A.); laricov@icf.ro (L.A.); vbratan@icf.ro (V.B.)

<sup>2</sup> National R&D Institute for Non-Ferrous and Rare Metals-IMNR, Biruintei Blv. 102, Pantelimon, 077145 Ilfov, Romania; ammocioiu@imnr.ro (A.-M.M.); atudor@imnr.ro (I.A.T.)

<sup>3</sup> Faculty of Industrial Engineering and Robotics, National University of Science and Technology Politehnica Bucharest-UPB, Splaiul Independentei, No. 313, 060042 Bucharest, Romania; baila\_d@yahoo.com

\* Correspondence: omocioiu@icf.ro

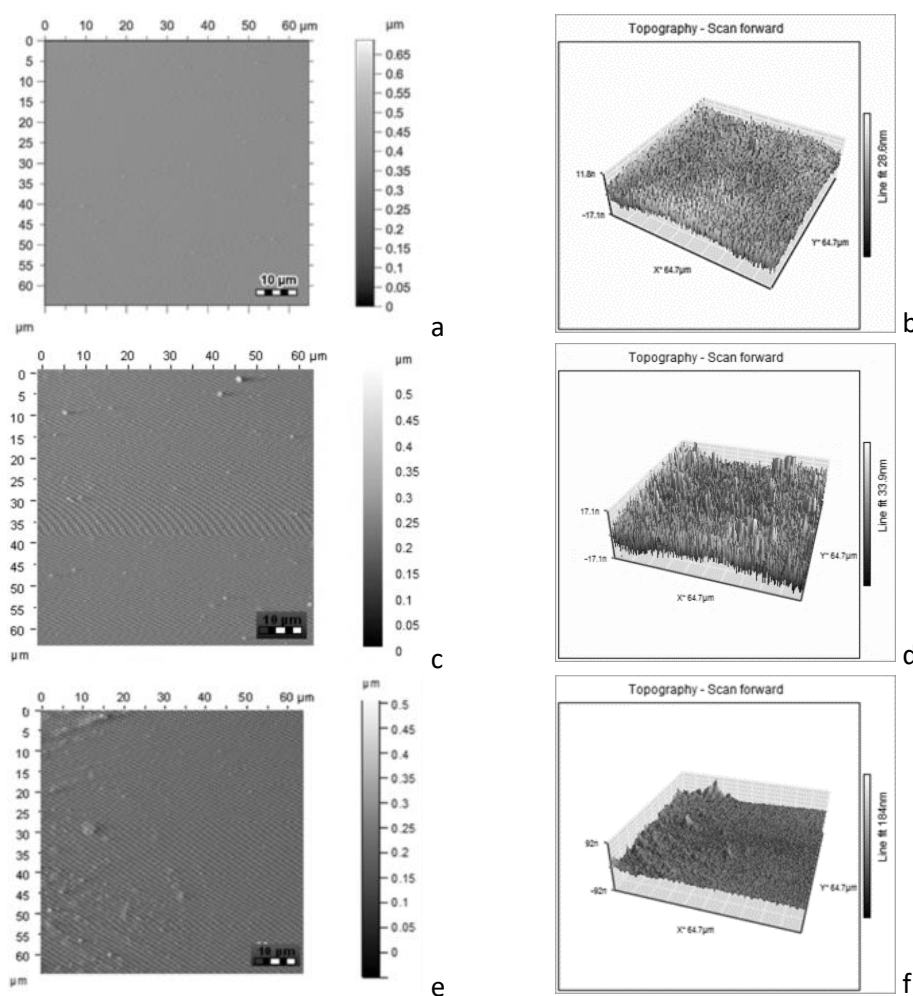

**Figure S1.** Atomic Force Microscopy: 2D images (a, c, e) and 3D view (b, d, f); Ta<sub>2</sub>O<sub>5</sub> film (a, b); 75Ta<sub>2</sub>O<sub>5</sub> 25ZnO film (c, d); 50Ta<sub>2</sub>O<sub>5</sub> 50ZnO film (e, f).
